# Supplementary material for: Development and validation of a prognostic model to predict clinical deterioration in hospitalized patients with COVID-19
Source: Research Square preprint supplement (doi:10.21203/rs.3.rs-701172/v2), 2021-07-19
Supplement: Supplementary file 1 [file be25e4eaf4f5ad581913cac3.docx]

Development and validation of a prognostic model to predict clinical deterioration in hospitalized patients with COVID-19

**Authors and Affiliations**

Javid Azadbakht1, MD, Sina Rashedi2, MD, MPH, Soheil Kooraki3, MD, Hamed Kowsari4, MD, *Elnaz Tabibian5, MD, MPH
1 Department of Radiology, Kashan University of Medical Sciences, Kashan, Iran.
Email: [Javidazadbakht2@gmail.com](mailto:Javidazadbakht2@gmail.com)

2 School of Medicine, Tehran University of Medical Sciences, Tehran, Iran.

Email: [sinarashedi73.sr@gmail.com](mailto:sinarashedi73.sr@gmail.com)
3 University of California Los Angeles, Los Angeles, CA, USA.
Email: [Soheil.kooraki@gmail.com](mailto:Soheil.kooraki@gmail.com)
4 Kashan University of Medical Sciences, Kashan, Iran.

Email: [kowsari_h@yahoo.com](mailto:kowsari_h@yahoo.com)
5 Department of Radiology, Tehran University of Medical Sciences, Tehran, Iran. Email: [elnaz.tabibian@gmail.com](mailto:elnaz.tabibian@gmail.com)

*Corresponding author:

Address: Department of Radiology, Medical Imaging Center, Imam Khomeini Hospital Complex, End of Keshavarz Blvd., Tehran, Iran.
Postal Code: 1419733141.
Email: [elnaz.tabibian@gmail.com](mailto:elnaz.tabibian@gmail.com)
Tel: +98-21-61190
Fax: +98-21-61190

# Running title: COVID-19 MODEL FOR CLINICAL DETERIORATION

Funding: This research did not receive any specific grant from funding agencies in the public, commercial, or not-for-profit sectors.

# Declarations of interest: None.
